# Supplementary material
Source: PubMed Central journal article supplement (PMC5027954)
Supplement: NIHMS816593-supplement-appendix.pdf [file NIHMS816593-supplement-appendix.pdf]

**APPENDIX**

**Appendix Table 1**  
**2013 per person spending**

| Diagnoses                                  | N              | Spending per Person |             |             |             |             |             |             |              |                |              |
|--------------------------------------------|----------------|---------------------|-------------|-------------|-------------|-------------|-------------|-------------|--------------|----------------|--------------|
|                                            |                | MHSUD Spending      |             |             |             |             |             |             |              | Total Spending |              |
|                                            |                | Inpatient           |             | Outpatient  |             | Drug        |             | Total       |              | Mean           | SD           |
|                                            |                | Mean                | SD          | Mean        | SD          | Mean        | SD          | Mean        | SD           | Mean           | SD           |
| <b>Individuals with MHSUD diagnosis</b>    | <b>292667</b>  | <b>261</b>          | <b>3082</b> | <b>631</b>  | <b>3405</b> | <b>479</b>  | <b>1454</b> | <b>1371</b> | <b>5586</b>  | <b>13165</b>   | <b>39071</b> |
| <b>Recognized</b>                          | <b>60396</b>   | <b>1147</b>         | <b>6517</b> | <b>1799</b> | <b>7036</b> | <b>1215</b> | <b>2517</b> | <b>4161</b> | <b>11384</b> | <b>18483</b>   | <b>51946</b> |
| <b>Unrecognized</b>                        | <b>232271</b>  | <b>31</b>           | <b>816</b>  | <b>327</b>  | <b>1137</b> | <b>288</b>  | <b>916</b>  | <b>645</b>  | <b>1752</b>  | <b>11782</b>   | <b>34822</b> |
| <b>Individuals without MHSUD diagnosis</b> | <b>1719413</b> | <b>0</b>            | <b>60</b>   | <b>3</b>    | <b>126</b>  | <b>35</b>   | <b>348</b>  | <b>38</b>   | <b>375</b>   | <b>3704</b>    | <b>14365</b> |
| <b>All Individuals</b>                     | <b>2012080</b> | <b>38</b>           | <b>1180</b> | <b>94</b>   | <b>1323</b> | <b>100</b>  | <b>660</b>  | <b>232</b>  | <b>2209</b>  | <b>5080</b>    | <b>20236</b> |

NOTES [Recognized and Unrecognized rows are mutually exclusive  
Individuals without MHSUD diagnoses have mental health spending because treatments, particularly prescription drugs, are not limited to treating MHSUD]

**Appendix Table 2**

**2013 Spending on unrecognized individuals**

|                                                              | N             | % of Total N <sup>b</sup> | Plan spending per person |             |            |             |            |             |            |             |       |                         | Total        |  |
|--------------------------------------------------------------|---------------|---------------------------|--------------------------|-------------|------------|-------------|------------|-------------|------------|-------------|-------|-------------------------|--------------|--|
|                                                              |               |                           | MHSUD Spending           |             |            |             |            |             |            |             |       | % of spend <sup>b</sup> |              |  |
|                                                              |               |                           | Inpatient                |             | Outpatient |             | Drug       |             | Total      |             |       |                         |              |  |
|                                                              |               |                           | Mean                     | SD          | Mean       | SD          | Mean       | SD          | Mean       | SD          |       |                         |              |  |
| <b>Unrecognized MHSUD Individuals<sup>a</sup></b>            | <b>232271</b> |                           | <b>31</b>                | <b>3082</b> | <b>327</b> | <b>3405</b> | <b>288</b> | <b>1454</b> | <b>645</b> | <b>5586</b> |       | <b>11782</b>            | <b>39071</b> |  |
| Adjustment disorders                                         | 30327         | 13.1%                     | 23                       | 587         | 780        | 1343        | 204        | 811         | 1006       | 1781        | 20.4% | 10317                   | 37414        |  |
| Anxiety disorders                                            | 87316         | 37.6%                     | 34                       | 730         | 399        | 1121        | 298        | 916         | 731        | 1727        | 42.6% | 11117                   | 32431        |  |
| Attention-deficit/conduct/disruptive behavior disorders      | 19364         | 8.3%                      | 8                        | 276         | 352        | 783         | 1078       | 1405        | 1437       | 1757        | 18.6% | 6329                    | 16405        |  |
| Delirium/dementia/amnestic/other cognitive disorders         | 2493          | 1.1%                      | 72                       | 1157        | 762        | 2166        | 299        | 951         | 1133       | 2703        | 1.9%  | 44537                   | 107336       |  |
| Developmental disorders                                      | 707           | 0.3%                      | 387                      | 5550        | 593        | 1708        | 465        | 1939        | 1446       | 6337        | 0.7%  | 29470                   | 85754        |  |
| Disorders usually diagnosed in infancy/childhood/adolescence | 307           | 0.1%                      | 74                       | 1289        | 534        | 1382        | 617        | 1949        | 1230       | 2852        | 0.3%  | 17957                   | 78807        |  |
| Impulse control disorders                                    | 427           | 0.2%                      | 179                      | 2044        | 834        | 1263        | 568        | 2150        | 1582       | 3252        | 0.5%  | 9085                    | 18874        |  |
| Mood disorders                                               | 59911         | 25.8%                     | 48                       | 990         | 374        | 1119        | 437        | 1137        | 859        | 2002        | 34.4% | 13998                   | 40464        |  |
| Personality disorders                                        | 0             | 0.0%                      | 0                        | 0           | 0          | 0           | 0          | 0           | 0          | 0           | 0.0%  | 0                       | 0            |  |
| Schizophrenia and other psychotic disorders                  | 12            | 0.0%                      | 0                        | 0           | 483        | 542         | 2242       | 3766        | 2724       | 3756        | 0.0%  | 22767                   | 35315        |  |
| Alcohol-related disorders                                    | 8084          | 3.5%                      | 739                      | 4060        | 1212       | 4012        | 183        | 832         | 2134       | 6186        | 11.5% | 19275                   | 50375        |  |
| Substance-related disorders                                  | 3056          | 1.3%                      | 319                      | 3327        | 898        | 4452        | 313        | 1318        | 1531       | 5933        | 3.1%  | 17279                   | 37638        |  |
| Suicide and intentional self-inflicted injury                | 300           | 0.1%                      | 1572                     | 4183        | 1470       | 1864        | 296        | 920         | 3339       | 4798        | 0.7%  | 17301                   | 46142        |  |
| Screening and history of MHSUD codes                         | 60017         | 25.8%                     | 53                       | 1235        | 133        | 1279        | 134        | 664         | 320        | 2027        | 12.8% | 17514                   | 41118        |  |
| Miscellaneous mental disorders                               | 18447         | 7.9%                      | 33                       | 770         | 301        | 982         | 229        | 913         | 564        | 1678        | 6.9%  | 12099                   | 38990        |  |

<sup>a</sup> Numbers in each CCS rows for the individual count (N) and MHSUD spending are not additive as individuals can have diagnoses associated with more than one CCS

<sup>b</sup> Percent of total N and total MH spending will be over 100 percent as categories are not mutually exclusive

**Appendix Table 3****Predictive ratios for MHSUD individuals by CCS**

| CCS Category                                                 | Predictive Ratios |             |                                    |
|--------------------------------------------------------------|-------------------|-------------|------------------------------------|
|                                                              | Unrecognized      | Recognized  | All MHSUD Individuals <sup>a</sup> |
| <b>All MHSUD individuals</b>                                 | <b>0.79</b>       | <b>0.97</b> | <b>0.84</b>                        |
| Adjustment disorders                                         | 0.69              | 0.84        | 0.73                               |
| Anxiety disorders                                            | 0.76              | 0.88        | 0.8                                |
| Attention-deficit/conduct/disruptive behavior disorders      | 0.6               | 0.85        | 0.69                               |
| Delirium/dementia/amnestic/other cognitive disorders         | 0.87              | 0.8         | 0.84                               |
| Developmental disorders                                      | 0.99              | 0.83        | 0.91                               |
| Disorders usually diagnosed in infancy/childhood/adolescence | 0.52              | 0.94        | 0.79                               |
| Impulse control disorders                                    | 0.68              | 0.72        | 0.71                               |
| Mood disorders                                               | 0.78              | 0.97        | 0.88                               |
| Personality disorders                                        | --                | 0.71        | 0.71                               |
| Schizophrenia and other psychotic disorders                  | 1.43              | 0.9         | 0.9                                |
| Alcohol-related disorders                                    | 0.87              | 0.78        | 0.83                               |
| Substance-related disorders                                  | 0.78              | 0.87        | 0.87                               |
| Suicide and intentional self-inflicted injury                | 0.8               | 0.69        | 0.7                                |
| Screening and history of MHSUD codes                         | 0.83              | 0.82        | 0.83                               |
| Miscellaneous mental disorders                               | 0.71              | 0.81        | 0.74                               |

Sources/notes: SOURCE: [Authors' analysis of sample.] NOTES [Recognized and unrecognized categories are mutually exclusive. Predictive ratios measure how well the risk adjustment system compensates plans for a subgroup by taking the ratio of average plan liabilities (total costs minus (compensated) predicted costs based on the HHS-HCC model) to average actual total costs for each subgroup of individuals.]

**Appendix Table 4**

**Comparison of MHSUD-HCC identification in the Exchange, Medicare Advantage, and Medicare Part D risk adjustment**

| Individuals with MHSUD | HHS-HCC |      | CMS-HCC |      | CMS-RxHCC |      | CMS-HCC and -RxHCC |      |
|------------------------|---------|------|---------|------|-----------|------|--------------------|------|
|                        | N       | %    | N       | %    | N         | %    | N                  | %    |
| HCC                    | 60396   | 20.6 | 61496   | 21.0 | 156688    | 53.5 | 163728             | 55.9 |
| Non-HCC                | 232271  | 79.4 | 231171  | 79.0 | 135979    | 46.5 | 128939             | 44.1 |

**Appendix Exhibit 5. Comparison of MHSUD Recognition in the Exchange, Medicare Advantage, and Medicare Part D Risk Adjustment Systems**

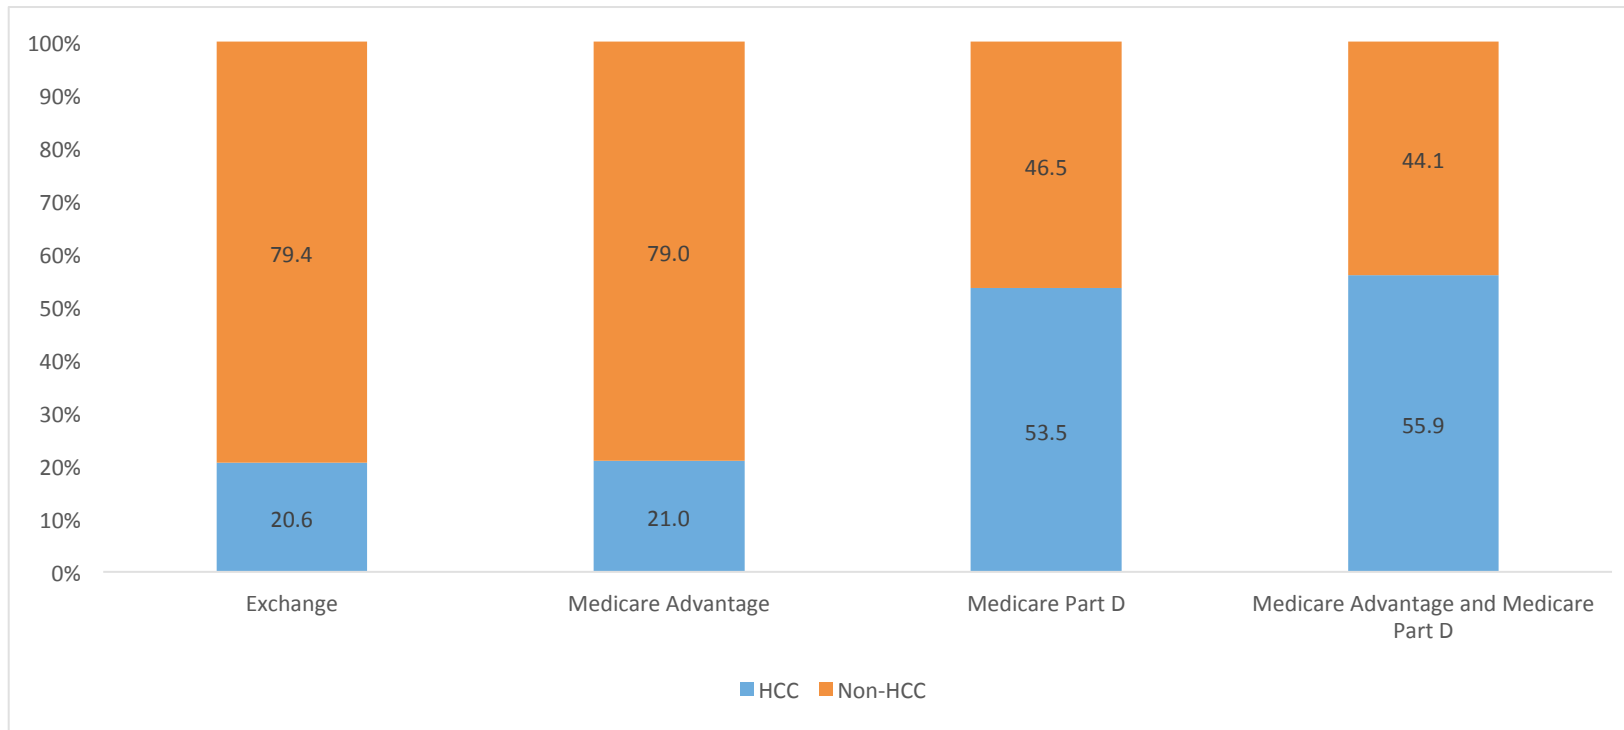

**Sources/notes: SOURCE: [Authors' analysis of sample using publicly-available definitions provided by HHS.]**
